# Supplementary material
Source: MDPI journal article supplement (https://www.mdpi.com/2079-9284/10/5/124)
Supplement: s1 [file s1]

## Supplementary material

**Table S1.** Relative mRNA expression of genes.

| Gene   | Gene ID   | Relative mRNA expression ration versus control |                                        |                                                          | P value |
|--------|-----------|------------------------------------------------|----------------------------------------|----------------------------------------------------------|---------|
|        |           | NHDF /NHEK treated with OdLe 0.5µg/ml          | NHDF/NHEK treated with UVA irradiation | NHDF/NHEK treated with UVA irradiation and OdLe 0.5µg/ml |         |
| INHBA  | 3624      | 1,104830868                                    | 1,062833434                            | 1,457237                                                 | 0.05    |
| OCLN   | 100506658 | 1,604012814                                    | 0,611515564                            | 1,604530                                                 | <0.05   |
| KLK7   | 5650      | 0,914961012                                    | 1,121626665                            | 1,506556                                                 | 0.05    |
| UGCG   | 7357      | 1,117272316                                    | 1,051485902                            | 2,009714                                                 | 0.05    |
| GBA1   | 2629      | 1,059501314                                    | 1,082324154                            | 2,048326                                                 | 0.05    |
| CDSN   | 1041      | 1,126131501                                    | 1,151772818                            | 1,554953                                                 | 0.05    |
| CD44   | 960       | 1,185017824                                    | 1,013537015                            | 1,397923                                                 | 0.05    |
| COL3A1 | 1281      | 2,209398891                                    | 1,092896166                            | 3,256626                                                 | 0.05    |
| FOXO3  | 2309      | 2,086426039                                    | 0,896079594                            | 1,367389                                                 | 0.05    |
| MMP14  | 4323      | 1,882440673                                    | 0,855582899                            | 5,885722                                                 | <0.05   |
| SIRT1  | 23411     | 1,581721763                                    | 1,325760925                            | 3,766153                                                 | <0.05   |
| SIRT2  | 22933     | 1,567952038                                    | 0,945430748                            | 3,375954                                                 | <0.05   |

**Table S2.** Gene name, Accesion No, Kegg pathway, Primer.

| Gene Symbol | Gene Name                                | Accession No                   | Kegg pathway             | Primmer F (5'-3')          | Primmer R (5'-3')          |
|-------------|------------------------------------------|--------------------------------|--------------------------|----------------------------|----------------------------|
| INHBA       | inhibin subunit beta A                   | <a href="#">NM_002192.4</a>    | <a href="#">map04350</a> | GCAGAAGTCTGGCTCTTCTTA<br>A | CCCCTCCTCTTCTTTCTCTTC      |
| OCLN        | Occludin                                 | <a href="#">NM_001205254.2</a> | <a href="#">map04670</a> | TTTGCTGTGAAACTCGAAG<br>AA  | CGCCAGTTGTGTAGTCTGTCT<br>C |
| KLK7        | kallikrein related peptidase 7           | <a href="#">NM_001207053.2</a> |                          | ATCCATGGTGAAGAAAGTCA<br>GG | TTGAGTGTAGACTCCTGGGTC<br>A |
| UGCG        | UDP-glucose ceramide glycosyltransferase | <a href="#">NM_003358.3</a>    | <a href="#">map00600</a> | TCCCAAATATGAAGTGCTCCT<br>T | TTCTGTACACATTGAAAC<br>C    |
| GBA1        | b-glycocerebrosidase                     | <a href="#">NM_000157.4</a>    | <a href="#">map00600</a> | GCTCAAGATACCCCTGATTC<br>AC | CGGACATTGTGGTGAGTACTG<br>T |
| CDSN        | Corneodesmosin                           | <a href="#">NM_001264.5</a>    |                          | CTCTTCCTCTTCCAGACCTTT      | TGAAGTAGCCACAGGGTAG<br>AT  |

|        |                                          |                                |                          |                            |                        |
|--------|------------------------------------------|--------------------------------|--------------------------|----------------------------|------------------------|
| SIRT1  | sirtuin 1                                | <a href="#">NM_001142498.1</a> | <a href="#">hsa04068</a> | GGAGCAGATTAGTAGGCGGCTT     | GCGCCATGGAAAATGTAACG   |
| SIRT2  | sirtuin 2                                | <a href="#">NM_001193286.1</a> | <a href="#">hsa04068</a> | TGACGCCCAAGTGTGAAGACT      | ATACAGGAGAAGAAACGCGCTG |
| FOXO3  | forkhead box O3                          | <a href="#">NM_001455.3</a>    |                          | CAGGCACCATGAATCTGAATGA     | GGAGCGTGATGTTATCCAGCA  |
| CD44   | CD44 molecule                            | <a href="#">NM_000610.3</a>    | <a href="#">hsa04512</a> | TCATCTTGGCATCCCTCTTG       | CCATTGCCACTGTTGATCACTA |
| COL3A1 | collagen, type III, alpha 1              | NM_000090.4                    | <a href="#">hsa04512</a> | GGAGTTTAGAAGTGCGCCATTC     | CCAAAAGCTGTAAGCGTTTGC  |
| MMP14  | matrix metalloproteinase 14              | <a href="#">NM_004995.4</a>    | <a href="#">hsa04668</a> | ACGACGTCTTCCAGTACCGAGA     | TAGGTCACGTAGCCCACTTGGT |
| ACTB   | actin, beta                              | <a href="#">NM_003254.2</a>    | <a href="#">hsa04066</a> | TTTATCCATCCCCTGCAAAC<br>G  | TTTTCAGAGCCTTGGAGGAGC  |
| GAPDH  | glyceraldehyde-3-phosphate dehydrogenase | <a href="#">NM_001101.3</a>    | <a href="#">hsa04810</a> | CTGTCCACCTTCCAGCAGATG<br>T | AGCATTGCGGTGGACGAT     |
